# Supplementary material for: Understanding catalysis
Source: Royal Society of Chemistry journal article supplement (doi:10.1039/c4cs00210e), 2014-01-01
Supplement: c4cs00210e1.pdf [file c4cs00210e1.pdf]

## Electronic Supplementary Information

### Understanding Catalysis

Emil Roduner

Institute of Physical Chemistry, University of Stuttgart, D-70569 Stuttgart, Germany  
and

Chemistry Department, University of Pretoria, Pretoria 0002, Republic of South Africa

**Table S1:** Standard thermodynamic enthalpies of formation,  $H_f^\circ$ , and standard entropies,  $S^\circ$ , for the reactants of the reactions in Table 1 of the manuscript. These values are taken from the NIST library: [webbook.nist.gov/chemistry/](http://webbook.nist.gov/chemistry/)

| Molecule             | $H_f^\circ$          | $S^\circ$                           |
|----------------------|----------------------|-------------------------------------|
|                      | kJ mol <sup>-1</sup> | J mol <sup>-1</sup> K <sup>-1</sup> |
| HCOOH(g)             | -379                 | 248.7                               |
| HCOOH(l)             | -425                 | 132                                 |
| CO <sub>2</sub> (g)  | -393.5               | 213.8                               |
| CO <sub>2</sub> (aq) | -413.0               | 121.4                               |
| CO(g)                | -110.5               | 197.7                               |
| H <sub>2</sub> O(g)  | -241.8               | 188.8                               |
| H <sub>2</sub> O(l)  | -285.8               | 69.9                                |
| H <sub>2</sub> (g)   | 0                    | 130.7                               |
| O <sub>2</sub> (g)   | 0                    | 205.1                               |
